# Supplementary material for: A New Methodology of Spatial Cross-Correlation Analysis
Source: PubMed Central journal article supplement (PMC4438072; doi:10.1371/journal.pone.0126158), 2015-05-19
Supplement: pone.0126158.s003.pdf [file pone.0126158.s003.pdf]

# An instruction for calculating SCI using MS Excel

The spatial crosscorrelation index (SCI) can be calculated with MS Excel. The basic steps are similar to those that are employed to compute Moran's index (Chen, 2013). Taking 29 Chinese regions, including provinces, autonomous regions, and municipalities directly under the central government, as an example, I will show how to evaluate the SCI using what is called *three-step method*.

## 1 Preparation of data

First of all, two datasets must be prepared as below: one is the vectors of per capita *gross regional product* (GRP) and *level of urbanization* (Figure S1), and the other is the railway distance matrix of Chinese capital cities (Figure S2).

|    | A              | B                | C                               |
|----|----------------|------------------|---------------------------------|
| 1  | <b>Region</b>  | <b>GRP(yuan)</b> | <b>Level of urbanization(%)</b> |
| 2  | Beijing        | 87475            | 86.20                           |
| 3  | Tianjin        | 93173            | 81.55                           |
| 4  | Hebei          | 36584            | 46.80                           |
| 5  | Shanxi         | 33628            | 51.26                           |
| 6  | Inner Mongolia | 63886            | 57.74                           |
| 7  | Liaoning       | 56649            | 65.65                           |
| 8  | Jilin          | 43415            | 53.70                           |
| 9  | Heilongjiang   | 35711            | 56.90                           |
| 10 | Shanghai       | 85373            | 89.30                           |
| 11 | Jiangsu        | 68347            | 63.00                           |
| 12 | Zhejiang       | 63374            | 63.20                           |
| 13 | Anhui          | 28792            | 46.50                           |
| 14 | Fujian         | 52763            | 59.60                           |
| 15 | Jiangxi        | 28800            | 47.51                           |
| 16 | Shandong       | 51768            | 52.43                           |
| 17 | Henan          | 31499            | 42.43                           |
| 18 | Hubei          | 38572            | 53.50                           |
| 19 | Hunan          | 33480            | 46.65                           |
| 20 | Guangdong      | 54095            | 67.40                           |
| 21 | Guangxi        | 27952            | 43.53                           |
| 22 | Chongqing      | 38914            | 56.98                           |
| 23 | Sichuan        | 29608            | 43.53                           |
| 24 | Guizhou        | 19710            | 36.41                           |
| 25 | Yunnan         | 22195            | 39.31                           |
| 26 | Shaanxi        | 38564            | 50.02                           |
| 27 | Gansu          | 21978            | 38.75                           |
| 28 | Qinghai        | 33181            | 47.44                           |
| 29 | Ningxia        | 36394            | 50.67                           |
| 30 | Xinjiang       | 33796            | 43.98                           |

Figure S1 The statistical data of GRP and urbanization level of 29 Chinese regions in 2012

|    | G            | H       | I       | J            | K       | L       | M        | N         | O      | P        | Q       |
|----|--------------|---------|---------|--------------|---------|---------|----------|-----------|--------|----------|---------|
| 1  |              | Beijing | Tianjin | Shijiazhuang | Taiyuan | Hohehot | Shenyang | Changchun | Harbin | Shanghai | Nanjing |
| 2  | Beijing      | 0       | 137     | 277          | 508     | 667     | 741      | 1046      | 1288   | 1463     | 1160    |
| 3  | Tianjin      | 137     | 0       | 419          | 650     | 804     | 728      | 1033      | 1275   | 1326     | 1023    |
| 4  | Shijiazhuang | 277     | 419     | 0            | 231     | 871     | 1126     | 1431      | 1673   | 1267     | 964     |
| 5  | Taiyuan      | 508     | 650     | 231          | 0       | 640     | 1255     | 1560      | 1802   | 1498     | 1195    |
| 6  | Hohehot      | 667     | 804     | 871          | 640     | 0       | 1408     | 1713      | 1955   | 2130     | 1827    |
| 7  | Shenyang     | 741     | 728     | 1126         | 1255    | 1408    | 0        | 305       | 547    | 2054     | 1751    |
| 8  | Changchun    | 1046    | 1033    | 1431         | 1560    | 1713    | 305      | 0         | 242    | 2359     | 2056    |
| 9  | Harbin       | 1288    | 1275    | 1673         | 1802    | 1955    | 547      | 242       | 0      | 2601     | 2298    |
| 10 | Shanghai     | 1463    | 1326    | 1267         | 1498    | 2130    | 2054     | 2359      | 2601   | 0        | 303     |
| 11 | Nanjing      | 1160    | 1023    | 964          | 1195    | 1827    | 1751     | 2056      | 2298   | 303      | 0       |
| 12 | Hangzhou     | 1589    | 1452    | 1393         | 1624    | 2256    | 2180     | 2485      | 2727   | 201      | 429     |
| 13 | Hefei        | 1074    | 973     | 914          | 1145    | 1777    | 1701     | 2006      | 2248   | 615      | 312     |
| 14 | Fuzhou       | 2334    | 2197    | 1915         | 2521    | 3303    | 2925     | 3230      | 3472   | 1180     | 1174    |
| 15 | Nanchang     | 1449    | 1444    | 1293         | 1544    | 2674    | 2151     | 2456      | 2698   | 844      | 838     |
| 16 | Jinan        | 497     | 360     | 301          | 532     | 1164    | 1088     | 1393      | 1635   | 966      | 663     |
| 17 | Zhengzhou    | 689     | 831     | 412          | 577     | 1362    | 1538     | 1843      | 2085   | 998      | 695     |
| 18 | Wuhan        | 1225    | 1367    | 948          | 1179    | 1898    | 1972     | 2277      | 2519   | 1235     | 1231    |
| 19 | Changsha     | 1587    | 1729    | 1310         | 1537    | 2256    | 2334     | 2639      | 2881   | 1207     | 1201    |
| 20 | Guangzhou    | 2294    | 2436    | 2017         | 2243    | 2962    | 3041     | 3346      | 3588   | 1810     | 1804    |
| 21 | Nanning      | 2566    | 2708    | 2289         | 2515    | 3234    | 3313     | 3618      | 3860   | 2082     | 2076    |
| 22 | Chongqing    | 2087    | 2230    | 1810         | 1997    | 2637    | 2834     | 3139      | 3381   | 2516     | 2093    |
| 23 | Chengdu      | 2042    | 2185    | 1765         | 1493    | 2133    | 2789     | 3094      | 3336   | 2351     | 2048    |
| 24 | Guiyang      | 2539    | 2681    | 2262         | 2460    | 3100    | 3286     | 3591      | 3833   | 2053     | 2054    |
| 25 | Kunming      | 3178    | 3320    | 2901         | 2593    | 3233    | 3925     | 4230      | 4472   | 2699     | 2693    |
| 26 | Xian         | 1159    | 1301    | 923          | 651     | 1291    | 1906     | 2211      | 2453   | 1509     | 1206    |
| 27 | Lanzhou      | 1811    | 1948    | 1599         | 1327    | 1144    | 2552     | 2857      | 3099   | 2185     | 1882    |
| 28 | Xining       | 2092    | 2235    | 1815         | 1543    | 1360    | 2839     | 3144      | 3386   | 2401     | 2098    |
| 29 | Yinchuan     | 1343    | 1480    | 1547         | 1316    | 676     | 2084     | 2389      | 2631   | 2355     | 2052    |
| 30 | Urumchi      | 3768    | 3911    | 3491         | 3219    | 3036    | 4515     | 4820      | 5062   | 4077     | 3774    |

Figure S2 The railroad distance matrix of 29 Chinese cities by railway network (partial results)

## 2 Process of calculations based on power function

### 2.1 Step 1: standardizing size measures

The procedure of variable standardization comprises three steps. **First**, compute the mean value of the GRP and the level of urbanization using the MS Excel function “average”. In cell B31, input a formula in the form “=AVERAGE(B2:B30)”, press the **Enter** key, and it will yield the GRP mean about 44471.586; In cell C31, input a formula “=AVERAGE(C2:C30)” and press **Enter**, and it will give the mean of urbanization level about 54.550. **Second**, compute the *population standard deviation* (PSD) using the Excel function “stdevp”. In cell B32, input a formula “=STDEVP(B2:B30)”, press **Enter**, yield a PSD value about 19578.182; In cell C32, input a formula “=STDEVP(C2:C30)”, press **Enter**, generate a PSD value around 13.226. **Third**, standardize the population size. Select a region in the worksheet including cells D2-D30, input a formula “=STANDARDIZE(B2:B30,B31,B32)”, press **Ctrl** and **Shift** and **Enter** at the same time,

thus yield the standardized array indicative of the GRP vector ( $x$ ); Select another region including cells E2-E30, input a formula “=STANDARDIZE(C2:C30,C31,C32)”, press **Ctrl** and **Shift** and then **Enter**, it generates the standardized array indicating the vector of urbanization level ( $y$ ). The results are displayed in [Figure S3](#) (see [File S2](#) for details).

|    | A              | B                | C                               | D            | E            |
|----|----------------|------------------|---------------------------------|--------------|--------------|
| 1  | <b>Region</b>  | <b>GRP(yuan)</b> | <b>Level of urbanization(%)</b> | <b>x</b>     | <b>y</b>     |
| 2  | Beijing        | 87475            | 86.20                           | 2.1965       | 2.3931       |
| 3  | Tianjin        | 93173            | 81.55                           | 2.4875       | 2.0415       |
| 4  | Hebei          | 36584            | 46.80                           | -0.4029      | -0.5860      |
| 5  | Shanxi         | 33628            | 51.26                           | -0.5539      | -0.2487      |
| 6  | Inner Mongolia | 63886            | 57.74                           | 0.9916       | 0.2412       |
| 7  | Liaoning       | 56649            | 65.65                           | 0.6220       | 0.8393       |
| 8  | Jilin          | 43415            | 53.70                           | -0.0540      | -0.0642      |
| 9  | Heilongjiang   | 35711            | 56.90                           | -0.4475      | 0.1777       |
| 10 | Shanghai       | 85373            | 89.30                           | 2.0891       | 2.6275       |
| 11 | Jiangsu        | 68347            | 63.00                           | 1.2195       | 0.6389       |
| 12 | Zhejiang       | 63374            | 63.20                           | 0.9655       | 0.6541       |
| 13 | Anhui          | 28792            | 46.50                           | -0.8009      | -0.6086      |
| 14 | Fujian         | 52763            | 59.60                           | 0.4235       | 0.3819       |
| 15 | Jiangxi        | 28800            | 47.51                           | -0.8005      | -0.5323      |
| 16 | Shandong       | 51768            | 52.43                           | 0.3727       | -0.1603      |
| 17 | Henan          | 31499            | 42.43                           | -0.6626      | -0.9164      |
| 18 | Hubei          | 38572            | 53.50                           | -0.3013      | -0.0794      |
| 19 | Hunan          | 33480            | 46.65                           | -0.5614      | -0.5973      |
| 20 | Guangdong      | 54095            | 67.40                           | 0.4915       | 0.9716       |
| 21 | Guangxi        | 27952            | 43.53                           | -0.8438      | -0.8332      |
| 22 | Chongqing      | 38914            | 56.98                           | -0.2839      | 0.1838       |
| 23 | Sichuan        | 29608            | 43.53                           | -0.7592      | -0.8332      |
| 24 | Guizhou        | 19710            | 36.41                           | -1.2648      | -1.3716      |
| 25 | Yunnan         | 22195            | 39.31                           | -1.1378      | -1.1523      |
| 26 | Shaanxi        | 38564            | 50.02                           | -0.3017      | -0.3424      |
| 27 | Gansu          | 21978            | 38.75                           | -1.1489      | -1.1946      |
| 28 | Qinghai        | 33181            | 47.44                           | -0.5767      | -0.5376      |
| 29 | Ningxia        | 36394            | 50.67                           | -0.4126      | -0.2933      |
| 30 | Xinjiang       | 33796            | 43.98                           | -0.5453      | -0.7992      |
| 31 | <b>Average</b> | <b>44471.586</b> | <b>54.550</b>                   | <b>0.000</b> | <b>0.000</b> |
| 32 | <b>Stdevp</b>  | <b>19578.182</b> | <b>13.226</b>                   | <b>1.000</b> | <b>1.000</b> |

**Figure S3** The standardized variables of GRP and urbanization levels of 29 Chinese regions

## 2.2 Step 2: generating unitary spatial weights matrix

The process of generating a spatial weights matrix also consists of three steps. **First**, convert the spatial distance matrix into a spatial contiguity matrix. Select an impedance function based on the inverse power law such as

$$v_{ij} = \begin{cases} r_{ij}^{-1}, & i \neq j \\ 0, & i = j \end{cases}, \quad (1)$$

where  $r_{ij}$  denotes the distance between city  $i$  and city  $j$ , and  $v_{ij}$  represents the spatial contiguity measurement. In cell H33, input a formula such as “=IF(F2=0,0,1/H2)”, press **Enter**, it will yield a number 0. Seizing the lower right corner of cell H33 with the mouse, and dragging it right and down, we can generate all the spatial contiguity values, which are partially shown in [Figure S4](#).

**Second**, summate the spatial contiguity values using the following formula:

$$T = \sum_i \sum_j v_{ij}, \quad (2)$$

where  $T$  denotes an amount obtained by double summation. In cell AJ62, input a formula “=SUM(H33:AJ61)”, strike **Enter** key, yield a sum about 0.6296. **Third**, transform the spatial contiguity matrix into a *unitized spatial weights matrix* ( $W$ ). In cell H64, input a formula “=H33/\$AJ\$62”, press **Enter**, and it will yield the first value of spatial weights. Catching the bottom right corner of cell H64, pulling it right and down, we can produce all the values of the unitary spatial weights matrix, which are displayed in [Figure S5](#) (see [File S2](#) for details).

|    | G            | H         | I         | J            | K         | L         | M         | N         | O         | P         | Q         |
|----|--------------|-----------|-----------|--------------|-----------|-----------|-----------|-----------|-----------|-----------|-----------|
| 32 |              | Beijing   | Tianjin   | Shijiazhuang | Taiyuan   | Hohehot   | Shenyang  | Changchun | Harbin    | Shanghai  | Nanjing   |
| 33 | Beijing      | 0         | 0.0072993 | 0.0036101    | 0.0019685 | 0.0014993 | 0.0013495 | 0.000956  | 0.0007764 | 0.0006835 | 0.0008621 |
| 34 | Tianjin      | 0.0072993 | 0         | 0.0023866    | 0.0015385 | 0.0012438 | 0.0013736 | 0.0009681 | 0.0007843 | 0.0007541 | 0.0009775 |
| 35 | Shijiazhuang | 0.0036101 | 0.0023866 | 0            | 0.004329  | 0.0011481 | 0.0008881 | 0.0006988 | 0.0005977 | 0.0007893 | 0.0010373 |
| 36 | Taiyuan      | 0.0019685 | 0.0015385 | 0.004329     | 0         | 0.0015625 | 0.0007968 | 0.000641  | 0.0005549 | 0.0006676 | 0.0008368 |
| 37 | Hohehot      | 0.0014993 | 0.0012438 | 0.0011481    | 0.0015625 | 0         | 0.0007102 | 0.0005838 | 0.0005115 | 0.0004695 | 0.0005473 |
| 38 | Shenyang     | 0.0013495 | 0.0013736 | 0.0008881    | 0.0007968 | 0.0007102 | 0         | 0.0032787 | 0.0018282 | 0.0004869 | 0.0005711 |
| 39 | Changchun    | 0.000956  | 0.0009681 | 0.0006988    | 0.000641  | 0.0005838 | 0.0032787 | 0         | 0.0041322 | 0.0004239 | 0.0004864 |
| 40 | Harbin       | 0.0007764 | 0.0007843 | 0.0005977    | 0.0005549 | 0.0005115 | 0.0018282 | 0.0041322 | 0         | 0.0003845 | 0.0004352 |
| 41 | Shanghai     | 0.0006835 | 0.0007541 | 0.0007893    | 0.0006676 | 0.0004695 | 0.0004869 | 0.0004239 | 0.0003845 | 0         | 0.0033003 |
| 42 | Nanjing      | 0.0008621 | 0.0009775 | 0.0010373    | 0.0008368 | 0.0005473 | 0.0005711 | 0.0004864 | 0.0004352 | 0.0033003 | 0         |
| 43 | Hangzhou     | 0.0006293 | 0.0006887 | 0.0007179    | 0.0006158 | 0.0004433 | 0.0004587 | 0.0004024 | 0.0003667 | 0.0049751 | 0.002331  |
| 44 | Hefei        | 0.0009311 | 0.0010277 | 0.0010941    | 0.0008734 | 0.0005627 | 0.0005879 | 0.0004985 | 0.0004448 | 0.001626  | 0.0032051 |
| 45 | Fuzhou       | 0.0004284 | 0.0004552 | 0.0005222    | 0.0003967 | 0.0003028 | 0.0003419 | 0.0003096 | 0.000288  | 0.0008475 | 0.0008518 |
| 46 | Nanchang     | 0.0006901 | 0.0006925 | 0.0007734    | 0.0006477 | 0.000374  | 0.0004649 | 0.0004072 | 0.0003706 | 0.0011848 | 0.0011933 |
| 47 | Jinan        | 0.0020121 | 0.0027778 | 0.0033223    | 0.0018797 | 0.0008591 | 0.0009191 | 0.0007179 | 0.0006116 | 0.0010352 | 0.0015083 |
| 48 | Zhengzhou    | 0.0014514 | 0.0012034 | 0.0024272    | 0.0017331 | 0.0007342 | 0.0006502 | 0.0005426 | 0.0004796 | 0.001002  | 0.0014388 |
| 49 | Wuhan        | 0.0008163 | 0.0007315 | 0.0010549    | 0.0008482 | 0.0005269 | 0.0005071 | 0.0004392 | 0.000397  | 0.0008097 | 0.0008123 |
| 50 | Changsha     | 0.0006301 | 0.0005784 | 0.0007634    | 0.0006506 | 0.0004433 | 0.0004284 | 0.0003789 | 0.0003471 | 0.0008285 | 0.0008326 |
| 51 | Guangzhou    | 0.0004359 | 0.0004105 | 0.0004958    | 0.0004458 | 0.0003376 | 0.0003288 | 0.0002989 | 0.0002787 | 0.0005525 | 0.0005543 |
| 52 | Nanning      | 0.0003897 | 0.0003693 | 0.0004369    | 0.0003976 | 0.0003092 | 0.0003018 | 0.0002764 | 0.0002591 | 0.0004803 | 0.0004817 |
| 53 | Chongqing    | 0.0004792 | 0.0004484 | 0.0005525    | 0.0005008 | 0.0003792 | 0.0003529 | 0.0003186 | 0.0002958 | 0.0003975 | 0.0004778 |
| 54 | Chengdu      | 0.0004897 | 0.0004577 | 0.0005666    | 0.0006698 | 0.0004688 | 0.0003586 | 0.0003232 | 0.0002998 | 0.0004254 | 0.0004883 |
| 55 | Guiyang      | 0.0003939 | 0.000373  | 0.0004421    | 0.0004065 | 0.0003226 | 0.0003043 | 0.0002785 | 0.0002609 | 0.0004871 | 0.0004869 |
| 56 | Kunming      | 0.0003147 | 0.0003012 | 0.0003447    | 0.0003857 | 0.0003093 | 0.0002548 | 0.0002364 | 0.0002236 | 0.0003705 | 0.0003713 |
| 57 | Xian         | 0.0008628 | 0.0007686 | 0.0010834    | 0.0015361 | 0.0007746 | 0.0005247 | 0.0004523 | 0.0004077 | 0.0006627 | 0.0008292 |
| 58 | Lanzhou      | 0.0005522 | 0.0005133 | 0.0006254    | 0.0007536 | 0.0008741 | 0.0003918 | 0.00035   | 0.0003227 | 0.0004577 | 0.0005313 |
| 59 | Xining       | 0.000478  | 0.0004474 | 0.000551     | 0.0006481 | 0.0007353 | 0.0003522 | 0.0003181 | 0.0002953 | 0.0004165 | 0.0004766 |
| 60 | Yinchuan     | 0.0007446 | 0.0006757 | 0.0006464    | 0.0007599 | 0.0014793 | 0.0004798 | 0.0004186 | 0.0003801 | 0.0004246 | 0.0004873 |
| 61 | Urumchi      | 0.0002654 | 0.0002557 | 0.0002865    | 0.0003107 | 0.0003294 | 0.0002215 | 0.0002075 | 0.0001976 | 0.0002453 | 0.000265  |

**Figure S4** The spatial contiguity matrix of 29 Chinese capital cities based on power function (partial results)

|    | G            | H         | I         | J            | K         | L         | M         | N         | O         | P         | Q         |
|----|--------------|-----------|-----------|--------------|-----------|-----------|-----------|-----------|-----------|-----------|-----------|
| 63 |              | Beijing   | Tianjin   | Shijiazhuang | Taiyuan   | Hohehot   | Shenyang  | Changchun | Harbin    | Shanghai  | Nanjing   |
| 64 | Beijing      | 0         | 0.0115931 | 0.0057338    | 0.0031265 | 0.0023812 | 0.0021434 | 0.0015184 | 0.0012331 | 0.0010856 | 0.0013692 |
| 65 | Tianjin      | 0.0115931 | 0         | 0.0037906    | 0.0024435 | 0.0019754 | 0.0021817 | 0.0015375 | 0.0012457 | 0.0011978 | 0.0015525 |
| 66 | Shijiazhuang | 0.0057338 | 0.0037906 | 0            | 0.0068755 | 0.0018235 | 0.0014105 | 0.0011099 | 0.0009493 | 0.0012536 | 0.0016476 |
| 67 | Taiyuan      | 0.0031265 | 0.0024435 | 0.0068755    | 0         | 0.0024816 | 0.0012655 | 0.0010181 | 0.0008814 | 0.0010602 | 0.0013291 |
| 68 | Hohehot      | 0.0023812 | 0.0019754 | 0.0018235    | 0.0024816 | 0         | 0.001128  | 0.0009272 | 0.0008124 | 0.0007457 | 0.0008693 |
| 69 | Shenyang     | 0.0021434 | 0.0021817 | 0.0014105    | 0.0012655 | 0.001128  | 0         | 0.0052074 | 0.0029036 | 0.0007732 | 0.0009071 |
| 70 | Changchun    | 0.0015184 | 0.0015375 | 0.0011099    | 0.0010181 | 0.0009272 | 0.0052074 | 0         | 0.006563  | 0.0006733 | 0.0007725 |
| 71 | Harbin       | 0.0012331 | 0.0012457 | 0.0009493    | 0.0008814 | 0.0008124 | 0.0029036 | 0.006563  | 0         | 0.0006106 | 0.0006911 |
| 72 | Shanghai     | 0.0010856 | 0.0011978 | 0.0012536    | 0.0010602 | 0.0007457 | 0.0007732 | 0.0006733 | 0.0006106 | 0         | 0.0052417 |
| 73 | Nanjing      | 0.0013692 | 0.0015525 | 0.0016476    | 0.0013291 | 0.0008693 | 0.0009071 | 0.0007725 | 0.0006911 | 0.0052417 | 0         |
| 74 | Hangzhou     | 0.0009995 | 0.0010938 | 0.0011402    | 0.000978  | 0.000704  | 0.0007286 | 0.0006391 | 0.0005824 | 0.0079017 | 0.0037022 |
| 75 | Hefei        | 0.0014788 | 0.0016323 | 0.0017377    | 0.0013871 | 0.0008938 | 0.0009337 | 0.0007917 | 0.0007065 | 0.0025825 | 0.0050905 |
| 76 | Fuzhou       | 0.0006805 | 0.0007229 | 0.0008294    | 0.00063   | 0.0004809 | 0.000543  | 0.0004917 | 0.0004574 | 0.001346  | 0.0013529 |
| 77 | Nanchang     | 0.0010961 | 0.0010999 | 0.0012283    | 0.0010287 | 0.000594  | 0.0007384 | 0.0006467 | 0.0005887 | 0.0018818 | 0.0018953 |
| 78 | Jinan        | 0.0031957 | 0.0044118 | 0.0052766    | 0.0029854 | 0.0013645 | 0.0014598 | 0.0011402 | 0.0009714 | 0.0016442 | 0.0023955 |
| 79 | Zhengzhou    | 0.0023052 | 0.0019113 | 0.003855     | 0.0027526 | 0.0011661 | 0.0010327 | 0.0008618 | 0.0007618 | 0.0015914 | 0.0022853 |
| 80 | Wuhan        | 0.0012965 | 0.0011619 | 0.0016754    | 0.0013471 | 0.0008368 | 0.0008054 | 0.0006975 | 0.0006305 | 0.001286  | 0.0012902 |
| 81 | Changsha     | 0.0010008 | 0.0009186 | 0.0012124    | 0.0010333 | 0.000704  | 0.0006805 | 0.0006018 | 0.0005513 | 0.0013159 | 0.0013224 |
| 82 | Guangzhou    | 0.0006923 | 0.000652  | 0.0007874    | 0.0007081 | 0.0005362 | 0.0005223 | 0.0004747 | 0.0004427 | 0.0008775 | 0.0008804 |
| 83 | Nanning      | 0.000619  | 0.0005865 | 0.0006939    | 0.0006315 | 0.0004911 | 0.0004794 | 0.000439  | 0.0004115 | 0.0007628 | 0.0007651 |
| 84 | Chongqing    | 0.000761  | 0.0007122 | 0.0008775    | 0.0007953 | 0.0006023 | 0.0005604 | 0.000506  | 0.0004698 | 0.0006313 | 0.0007588 |
| 85 | Chengdu      | 0.0007778 | 0.0007269 | 0.0008999    | 0.0010638 | 0.0007446 | 0.0005695 | 0.0005133 | 0.0004761 | 0.0006756 | 0.0007755 |
| 86 | Guiyang      | 0.0006255 | 0.0005924 | 0.0007021    | 0.0006456 | 0.0005123 | 0.0004833 | 0.0004423 | 0.0004144 | 0.0007736 | 0.0007732 |
| 87 | Kunming      | 0.0004998 | 0.0004784 | 0.0005475    | 0.0006125 | 0.0004913 | 0.0004046 | 0.0003755 | 0.0003552 | 0.0005885 | 0.0005898 |
| 88 | Xian         | 0.0013704 | 0.0012208 | 0.0017207    | 0.0024397 | 0.0012302 | 0.0008333 | 0.0007183 | 0.0006475 | 0.0010525 | 0.001317  |
| 89 | Lanzhou      | 0.000877  | 0.0008153 | 0.0009933    | 0.0011969 | 0.0013883 | 0.0006224 | 0.0005559 | 0.0005125 | 0.0007269 | 0.0008439 |
| 90 | Xining       | 0.0007592 | 0.0007106 | 0.0008751    | 0.0010293 | 0.0011678 | 0.0005594 | 0.0005052 | 0.0004691 | 0.0006615 | 0.000757  |
| 91 | Yinchuan     | 0.0011826 | 0.0010731 | 0.0010267    | 0.0012069 | 0.0023495 | 0.0007621 | 0.0006648 | 0.0006037 | 0.0006744 | 0.000774  |
| 92 | Urumchi      | 0.0004215 | 0.0004061 | 0.000455     | 0.0004934 | 0.0005231 | 0.0003518 | 0.0003295 | 0.0003138 | 0.0003896 | 0.0004208 |

**Figure S5** The unitized spatial weights matrix of 29 Chinese capital cities based on power function  
(partial results)

### 2.3 Step 3: computing SCI

By means of the formula  $R_c = x^T W y$  or  $R_c = y^T W x$ , we can calculate the SCI value ( $R_c$ ) using Excel functions “mmult” and “transpose” easily. According to the number and result arrangement in the same worksheet, in any cell, say, B36, we can input a formula as follows:

“=MMULT(MMULT(TRANSPOSE(E2:E30),H64:AJ92),D2:D30)”

Or

“=MMULT(MMULT(TRANSPOSE(D2:D30),H64:AJ92),E2:E30)”

Pressing three keys **Ctrl**, **Shift** and **Enter** at the same time yields the SCI value immediately. The result is about 0.156644, which is based on PSD (see [File S2](#) for details).

If we turn the PSD function, stdevp, into the *sample standard deviation* (SSD) function, stdev, we will have a SCI value based on SSD. In other words, inputting a formula such as “=STDEV(B2:B30)” in cell B32 to replace the formula “=STDEVP(B2:B30)” yields a SSD value about 19924.7257, inputting a formula “=STDEV(C2:C30)” in cell C32 to replace the formula

“=STDEVP(C2:C30)” yields a SSD value about 13.4596. Accordingly, the PSD-based SCI will change to the SSD-based SCI, and the result is approximately 0.151243.

|    | G            | H         | I         | J            | K         | L         | M         | N         | O         | P         | Q         |
|----|--------------|-----------|-----------|--------------|-----------|-----------|-----------|-----------|-----------|-----------|-----------|
| 32 |              | Beijing   | Tianjin   | Shijiazhuang | Taiyuan   | Hohehot   | Shenyang  | Changchun | Harbin    | Shanghai  | Nanjing   |
| 33 | Beijing      | 0         | 0.8573734 | 0.7326164    | 0.5651874 | 0.4727491 | 0.4350436 | 0.3088522 | 0.2353427 | 0.1933454 | 0.2717317 |
| 34 | Tianjin      | 0.8573734 | 0         | 0.6246081    | 0.4818629 | 0.4053225 | 0.4414426 | 0.3133951 | 0.2388043 | 0.225509  | 0.3169351 |
| 35 | Shijiazhuang | 0.7326164 | 0.6246081 | 0            | 0.7714644 | 0.3759391 | 0.2823098 | 0.2004213 | 0.1527193 | 0.2409598 | 0.33865   |
| 36 | Taiyuan      | 0.5651874 | 0.4818629 | 0.7714644    | 0         | 0.4873058 | 0.2442297 | 0.1733869 | 0.1321193 | 0.1858919 | 0.2612564 |
| 37 | Hohehot      | 0.4727491 | 0.4053225 | 0.3759391    | 0.4873058 | 0         | 0.2056665 | 0.1460096 | 0.111258  | 0.0914039 | 0.1284609 |
| 38 | Shenyang     | 0.4350436 | 0.4414426 | 0.2823098    | 0.2442297 | 0.2056665 | 0         | 0.7099339 | 0.5409634 | 0.0995493 | 0.1399087 |
| 39 | Changchun    | 0.3088522 | 0.3133951 | 0.2004213    | 0.1733869 | 0.1460096 | 0.7099339 | 0         | 0.7619912 | 0.0706734 | 0.0993259 |
| 40 | Harbin       | 0.2353427 | 0.2388043 | 0.1527193    | 0.1321193 | 0.111258  | 0.5409634 | 0.7619912 | 0         | 0.0538525 | 0.0756855 |
| 41 | Shanghai     | 0.1933454 | 0.225509  | 0.2409598    | 0.1858919 | 0.0914039 | 0.0995493 | 0.0706734 | 0.0538525 | 0         | 0.7115306 |
| 42 | Nanjing      | 0.2717317 | 0.3169351 | 0.33865      | 0.2612564 | 0.1284609 | 0.1399087 | 0.0993259 | 0.0756855 | 0.7115306 | 0         |
| 43 | Hangzhou     | 0.1678301 | 0.1957491 | 0.2091609    | 0.1613602 | 0.0793415 | 0.086412  | 0.0613468 | 0.0467457 | 0.7979032 | 0.6176316 |
| 44 | Hefei        | 0.2992899 | 0.3352439 | 0.3582132    | 0.2763487 | 0.1358819 | 0.1479909 | 0.1050638 | 0.0800577 | 0.5011836 | 0.7043739 |
| 45 | Fuzhou       | 0.0726861 | 0.0847776 | 0.1163707    | 0.0589157 | 0.0244773 | 0.0374245 | 0.0265689 | 0.0202453 | 0.2656955 | 0.2674921 |
| 46 | Nanchang     | 0.1964098 | 0.197516  | 0.2340247    | 0.1765311 | 0.0496131 | 0.0892731 | 0.063378  | 0.0482935 | 0.3875148 | 0.3901352 |
| 47 | Jinan        | 0.5722139 | 0.6674034 | 0.7131308    | 0.550155  | 0.2705136 | 0.2946203 | 0.2091609 | 0.1593788 | 0.3378901 | 0.4748779 |
| 48 | Zhengzhou    | 0.4612102 | 0.3932148 | 0.6295384    | 0.5230384 | 0.2165722 | 0.1777248 | 0.1261729 | 0.0961426 | 0.3259609 | 0.4581124 |
| 49 | Wuhan        | 0.2525996 | 0.2153593 | 0.3447911    | 0.2659941 | 0.1186142 | 0.1091537 | 0.0774919 | 0.0590482 | 0.2497782 | 0.250903  |
| 50 | Changsha     | 0.1682075 | 0.143409  | 0.2295984    | 0.1779246 | 0.0793415 | 0.0726861 | 0.0516023 | 0.0393205 | 0.2577587 | 0.2595017 |
| 51 | Guangzhou    | 0.0760263 | 0.0648179 | 0.1037737    | 0.0805086 | 0.035901  | 0.0328526 | 0.0233232 | 0.0177721 | 0.1309374 | 0.1318228 |
| 52 | Nanning      | 0.0560118 | 0.0477541 | 0.0764545    | 0.0593141 | 0.0264498 | 0.0242039 | 0.0171832 | 0.0130934 | 0.0964672 | 0.0971195 |
| 53 | Chongqing    | 0.0959269 | 0.0816928 | 0.1309374    | 0.1061313 | 0.0517184 | 0.0414521 | 0.0294282 | 0.0224241 | 0.0592475 | 0.0952826 |
| 54 | Chengdu      | 0.1009002 | 0.0859281 | 0.1377258    | 0.1869389 | 0.0910964 | 0.0436011 | 0.0309539 | 0.0235866 | 0.0713113 | 0.1002225 |
| 55 | Guiyang      | 0.0577365 | 0.0492245 | 0.0788086    | 0.0630939 | 0.030746  | 0.0249492 | 0.0177123 | 0.0134966 | 0.0996612 | 0.0995493 |
| 56 | Kunming      | 0.0281669 | 0.0240143 | 0.0384471    | 0.0543386 | 0.0264795 | 0.0121715 | 0.008641  | 0.0065844 | 0.0482393 | 0.0485655 |
| 57 | Xian         | 0.2720371 | 0.2319312 | 0.3546103    | 0.4813219 | 0.234551  | 0.1175531 | 0.0834549 | 0.0635919 | 0.1836093 | 0.2580483 |
| 58 | Lanzhou      | 0.1307904 | 0.1121362 | 0.1659555    | 0.2252558 | 0.2766593 | 0.0568995 | 0.0403949 | 0.0307806 | 0.0859281 | 0.1207651 |
| 59 | Xining       | 0.0953897 | 0.0812353 | 0.1302041    | 0.1767295 | 0.2170593 | 0.0412199 | 0.0292634 | 0.0222985 | 0.0674168 | 0.094749  |
| 60 | Yinchuan     | 0.2212438 | 0.1896886 | 0.1759373    | 0.2280562 | 0.4679941 | 0.0962507 | 0.0683316 | 0.0520681 | 0.0709917 | 0.0997732 |
| 61 | Urumchi      | 0.0145188 | 0.0123645 | 0.0198178    | 0.0268992 | 0.0330376 | 0.0062739 | 0.0044541 | 0.003394  | 0.0102612 | 0.0144213 |

Figure S6 The spatial contiguity matrix of 29 Chinese capital cities based on negative exponential function (partial results)

### 3 Process of calculations based on exponential function

We have more than one way to generate a spatial contiguity matrix (Chen, 2012). In step 2 of Section 2, the power function can be substituted with an exponential function to define a distance-decay function. The standard form of a negative exponential function is as below:

$$v_{ij} = \begin{cases} \exp(-2r_{ij} / \bar{r}), & i \neq j \\ 0, & i = j \end{cases}, \quad (3)$$

where  $\bar{r}$  denotes the average distance, or the mean value of the elements in the distance matrix. In cell H33, input a formula “=IF(H2=0,0,EXP(-2\*H2/(SUM(\$H\$2:\$AJ\$30)/(29\*30))))”, strike **Enter** key, it will yield a number 0. Seizing the bottom right corner of cell H33 and dragging it

right and down produce all the spatial contiguity values based on the negative exponential function, which are shown in [Figure S6](#). Then, summate the spatial contiguity values using [equation \(3\)](#). In cell AJ62, input a formula “=SUM(H33:AJ61)”, press **Enter**, yield a sum about 154.0418. Finally, transform the spatial contiguity matrix into a normalized spatial weights matrix, which are shown in [Figure S7](#). The other and rest steps are the same as those illustrated in [Section 2](#) (see [File S2](#) for details).

|    | G            | H         | I         | J            | K         | L         | M         | N         | O         | P         | Q         |
|----|--------------|-----------|-----------|--------------|-----------|-----------|-----------|-----------|-----------|-----------|-----------|
| 63 |              | Beijing   | Tianjin   | Shijiazhuang | Taiyuan   | Hohehot   | Shenyang  | Changchun | Harbin    | Shanghai  | Nanjing   |
| 64 | Beijing      | 0         | 0.0055658 | 0.004756     | 0.0036691 | 0.003069  | 0.0028242 | 0.002005  | 0.0015278 | 0.0012551 | 0.001764  |
| 65 | Tianjin      | 0.0055658 | 0         | 0.0040548    | 0.0031281 | 0.0026312 | 0.0028657 | 0.0020345 | 0.0015503 | 0.0014639 | 0.0020575 |
| 66 | Shijiazhuang | 0.004756  | 0.0040548 | 0            | 0.0050081 | 0.0024405 | 0.0018327 | 0.0013011 | 0.0009914 | 0.0015642 | 0.0021984 |
| 67 | Taiyuan      | 0.0036691 | 0.0031281 | 0.0050081    | 0         | 0.0031635 | 0.0015855 | 0.0011256 | 0.0008577 | 0.0012068 | 0.001696  |
| 68 | Hohehot      | 0.003069  | 0.0026312 | 0.0024405    | 0.0031635 | 0         | 0.0013351 | 0.0009479 | 0.0007223 | 0.0005934 | 0.0008339 |
| 69 | Shenyang     | 0.0028242 | 0.0028657 | 0.0018327    | 0.0015855 | 0.0013351 | 0         | 0.0046087 | 0.0035118 | 0.0006462 | 0.0009083 |
| 70 | Changchun    | 0.002005  | 0.0020345 | 0.0013011    | 0.0011256 | 0.0009479 | 0.0046087 | 0         | 0.0049467 | 0.0004588 | 0.0006448 |
| 71 | Harbin       | 0.0015278 | 0.0015503 | 0.0009914    | 0.0008577 | 0.0007223 | 0.0035118 | 0.0049467 | 0         | 0.0003496 | 0.0004913 |
| 72 | Shanghai     | 0.0012551 | 0.0014639 | 0.0015642    | 0.0012068 | 0.0005934 | 0.0006462 | 0.0004588 | 0.0003496 | 0         | 0.0046191 |
| 73 | Nanjing      | 0.001764  | 0.0020575 | 0.0021984    | 0.001696  | 0.0008339 | 0.0009083 | 0.0006448 | 0.0004913 | 0.0046191 | 0         |
| 74 | Hangzhou     | 0.0010895 | 0.0012708 | 0.0013578    | 0.0010475 | 0.0005151 | 0.000561  | 0.0003982 | 0.0003035 | 0.0051798 | 0.0040095 |
| 75 | Hefei        | 0.0019429 | 0.0021763 | 0.0023254    | 0.001794  | 0.0008821 | 0.0009607 | 0.000682  | 0.0005197 | 0.0032536 | 0.0045726 |
| 76 | Fuzhou       | 0.0004719 | 0.0005504 | 0.0007554    | 0.0003825 | 0.0001589 | 0.000243  | 0.0001725 | 0.0001314 | 0.0017248 | 0.0017365 |
| 77 | Nanchang     | 0.001275  | 0.0012822 | 0.0015192    | 0.001146  | 0.0003221 | 0.0005795 | 0.0004114 | 0.0003135 | 0.0025156 | 0.0025327 |
| 78 | Jinan        | 0.0037147 | 0.0043326 | 0.0046295    | 0.0035715 | 0.0017561 | 0.0019126 | 0.0013578 | 0.0010346 | 0.0021935 | 0.0030828 |
| 79 | Zhengzhou    | 0.0029941 | 0.0025526 | 0.0040868    | 0.0033954 | 0.0014059 | 0.0011537 | 0.0008191 | 0.0006241 | 0.0021161 | 0.0029739 |
| 80 | Wuhan        | 0.0016398 | 0.0013981 | 0.0022383    | 0.0017268 | 0.00077   | 0.0007086 | 0.0005031 | 0.0003833 | 0.0016215 | 0.0016288 |
| 81 | Changsha     | 0.001092  | 0.000931  | 0.0014905    | 0.001155  | 0.0005151 | 0.0004719 | 0.000335  | 0.0002553 | 0.0016733 | 0.0016846 |
| 82 | Guangzhou    | 0.0004935 | 0.0004208 | 0.0006737    | 0.0005226 | 0.0002331 | 0.0002133 | 0.0001514 | 0.0001154 | 0.00085   | 0.0008558 |
| 83 | Nanning      | 0.0003636 | 0.00031   | 0.0004963    | 0.0003851 | 0.0001717 | 0.0001571 | 0.0001115 | 8.5E-05   | 0.0006262 | 0.0006305 |
| 84 | Chongqing    | 0.0006227 | 0.0005303 | 0.00085      | 0.000689  | 0.0003357 | 0.0002691 | 0.000191  | 0.0001456 | 0.0003846 | 0.0006186 |
| 85 | Chengdu      | 0.000655  | 0.0005578 | 0.0008941    | 0.0012136 | 0.0005914 | 0.000283  | 0.0002009 | 0.0001531 | 0.0004629 | 0.0006506 |
| 86 | Guiyang      | 0.0003748 | 0.0003196 | 0.0005116    | 0.0004096 | 0.0001996 | 0.000162  | 0.000115  | 8.762E-05 | 0.000647  | 0.0006462 |
| 87 | Kunming      | 0.0001829 | 0.0001559 | 0.0002496    | 0.0003528 | 0.0001719 | 7.901E-05 | 5.61E-05  | 4.274E-05 | 0.0003132 | 0.0003153 |
| 88 | Xian         | 0.001766  | 0.0015056 | 0.002302     | 0.0031246 | 0.0015226 | 0.0007631 | 0.0005418 | 0.0004128 | 0.0011919 | 0.0016752 |
| 89 | Lanzhou      | 0.0008491 | 0.000728  | 0.0010773    | 0.0014623 | 0.001796  | 0.0003694 | 0.0002622 | 0.0001998 | 0.0005578 | 0.000784  |
| 90 | Xining       | 0.0006192 | 0.0005274 | 0.0008453    | 0.0011473 | 0.0014091 | 0.0002676 | 0.00019   | 0.0001448 | 0.0004377 | 0.0006151 |
| 91 | Yinchuan     | 0.0014363 | 0.0012314 | 0.0011421    | 0.0014805 | 0.0030381 | 0.0006248 | 0.0004436 | 0.000338  | 0.0004609 | 0.0006477 |
| 92 | Urumchi      | 9.425E-05 | 8.027E-05 | 0.0001287    | 0.0001746 | 0.0002145 | 4.073E-05 | 2.891E-05 | 2.203E-05 | 6.661E-05 | 9.362E-05 |

**Figure S7** The unitized spatial weights matrix of 29 Chinese capital cities based on negative exponential function (partial results)

## References

- Chen YG (2012). On the four types of weight functions for spatial contiguity matrix. *Letters in Spatial and Resource Sciences*, 5(2): 65-72
- Chen YG (2013). New approaches for calculating Moran’s index of spatial autocorrelation. *PLoS ONE*, 8(7): e68336
